# Supplementary material
Source: publisher figshare collection journal article supplement (https://tandf.figshare.com/articles/dataset/_/5531032)
Supplement: Supplementary file 1 [file 1]

**Supplemental Table 2.** List of fossil taxa studied with their traditional subordinal and familial attributions. Excludes ancestrulae of completely unknown identity.

Protoecium pseudopore pattern types are: 1 = no pseudopores; 2 = sparse; 3 = peripheral row; 4 = peripheral row and distomedial pair; 5 = peripheral row plus sparse central; 6 = peripheral band; 7 = central only; 8 = pan-protoecial; n/a = interior walled and therefore lacking pseudopores; iw = interior-walled protoecium lacking pseudopores.

| Suborder     | Family           | Species                   | Age                 |          |     |
|--------------|------------------|---------------------------|---------------------|----------|-----|
| Tubuliporina | Annectocymidae   | <i>Annectocyma</i> sp.    | Pleistocene         | pdt16714 | 6   |
|              |                  |                           |                     |          |     |
|              | Diaperoeciidae   | <i>Diaperoecia</i>        | Pleistocene         | pdt16188 | 6   |
|              |                  | <i>purpurascens</i>       |                     |          |     |
|              | Fasciculiporidae | ? <i>Fasciculipora</i>    | Pleistocene         | pdt16183 | 1   |
|              | Multisparsidae   | <i>Idmonea triquetra</i>  | Jurassic, Bathonian | pdt18168 | ?   |
|              |                  | <i>Reptomultisparsa</i>   | Jurassic, Bathonian | pdt18237 | ?   |
|              |                  | <i>cobergonensis</i>      |                     |          |     |
|              |                  | <i>Reptomultisparsa</i>   |                     | pdt17684 | ?   |
|              |                  | <i>cobra</i>              |                     | ,        |     |
|              |                  |                           |                     | pdt18225 |     |
|              |                  | <i>Reptomultisparsa</i>   | Jurassic, Aalenian  | pdt17658 | ?   |
|              |                  | <i>cricopora</i>          |                     | ,        |     |
|              |                  |                           |                     | pdt18240 |     |
|              |                  | <i>Reptomultisparsa</i>   | Jurassic, Aalenian  | pdt18097 | ?8  |
|              |                  | aff. <i>cricopora</i>     |                     | ,        |     |
|              |                  |                           |                     | pdt18099 |     |
|              |                  | ? <i>Reptomultisparsa</i> | Jurassic, Bajocian  | pdt18117 | ?1, |
|              |                  | <i>a oolitica</i>         |                     |          | ?3  |
|              | Oncousoeciidae   | <i>Oncousoecia</i> sp. 1  | Jurassic, Callovian | pdt18139 | 1   |
|              |                  |                           |                     | ,        |     |
|              |                  |                           |                     | pdt18141 |     |
|              |                  |                           |                     | ,        |     |
|              |                  |                           |                     | pdt18142 |     |
|              |                  |                           |                     | ,        |     |
|              |                  |                           |                     | pdt18144 |     |

---

|               |                           |                     |          |   |
|---------------|---------------------------|---------------------|----------|---|
|               | <i>Oncousoecia</i> sp. 2  | Pleistocene         | pdt9020  | 3 |
|               | <i>Microeciella</i> sp. 1 | Jurassic, Aalenian  | pdt18101 | ? |
|               | <i>Microeciella</i> sp. 2 | Jurassic, Aalenian  | pdt18113 | ? |
| Plagioeciidae | <i>Elaphopora?</i>        | Jurassic, Bathonian | pdt18120 | ? |
|               | <i>enstonensis</i>        |                     | ,        |   |
|               |                           |                     | pdt18122 |   |
|               | <i>Hyporosopora</i>       | Jurassic, Bathonian | pdt10651 | 5 |
|               | <i>incrustans</i>         |                     | ,        |   |
|               |                           |                     | pdt18084 |   |
|               |                           |                     | ,        |   |
|               |                           |                     | pdt18193 |   |
|               |                           |                     | ,        |   |
|               |                           |                     | pdt18245 |   |
|               |                           |                     | ,        |   |
|               |                           |                     | pdt18148 |   |
|               |                           |                     | ,        |   |
|               |                           |                     | pdt18196 |   |
|               |                           |                     | ,        |   |
|               |                           |                     | pdt18151 |   |
|               |                           |                     | ,        |   |
|               |                           |                     | pdt18197 |   |
|               |                           |                     | ,        |   |
|               |                           |                     | pdt18199 |   |
|               |                           |                     | ,        |   |
|               |                           |                     | pdt18200 |   |
|               |                           |                     | ,        |   |
|               |                           |                     | pdt18202 |   |
|               |                           |                     | ,        |   |
|               |                           |                     | pdt18203 |   |
|               |                           |                     | ,        |   |
|               |                           |                     | pdt18205 |   |
|               |                           |                     | ,        |   |
|               |                           |                     | pdt18211 |   |
|               |                           |                     | ,        |   |

---

---

|                         |                     |          |     |
|-------------------------|---------------------|----------|-----|
|                         |                     | pdt18212 |     |
|                         |                     | ,        |     |
|                         |                     | pdt18213 |     |
| <i>Hyporosopora</i>     | Jurassic, Bathonian | pdt17681 | ?3, |
| <i>parvipora</i>        |                     | ,        | ?5  |
|                         |                     | pdt18170 |     |
|                         |                     | ,        |     |
|                         |                     | pdt18180 |     |
|                         |                     | ,        |     |
|                         |                     | pdt18172 |     |
|                         |                     | ,        |     |
|                         |                     | pdt18182 |     |
|                         |                     | ,        |     |
|                         |                     | pdt18173 |     |
|                         |                     | ,        |     |
|                         |                     | pdt18184 |     |
|                         |                     | ,        |     |
|                         |                     | pdt18175 |     |
| <i>Hyporosopora</i>     | Jurassic, Tithonian | pdt18228 | 8   |
| <i>portlandica</i>      |                     | ,        |     |
|                         |                     | pdt18231 |     |
|                         |                     | ,        |     |
|                         |                     | pdt18105 |     |
|                         |                     | ,        |     |
|                         |                     | pdt18186 |     |
|                         |                     | ,        |     |
|                         |                     | pdt18109 |     |
|                         |                     | ,        |     |
|                         |                     | pdt18189 |     |
|                         |                     | ,        |     |
|                         |                     | pdt18110 |     |
|                         |                     | ,        |     |
|                         |                     | pdt18191 |     |
| <i>Hyporosopora</i> sp. | Jurassic,           | pdt17631 | ?   |

---

|                |                                                            |                     |                                                                                                                |    |
|----------------|------------------------------------------------------------|---------------------|----------------------------------------------------------------------------------------------------------------|----|
|                | 1 [La Rochelle,<br>France]                                 | Kimmeridgian        |                                                                                                                |    |
|                | aff. <i>Liripora</i><br>[Kuromatsunai,<br>Japan]           | Pleistocene         | pdt10934                                                                                                       | 2  |
|                | <i>Mesonopora</i><br><i>concatenata</i>                    | Jurassic, Bathonian | pdt17590<br>,<br>pdt17592<br>,<br>pdt17594<br>,<br>pdt18130<br>,<br>pdt18132<br>,<br>pdt18134<br>,<br>pdt18135 | 5  |
|                | <i>Theonoo</i> sp.                                         | Jurassic, Aalenian  | pdt18242                                                                                                       | ?  |
| Stomatoporidae | <i>Proboscino</i> <i>p</i> <i>ora</i><br><i>divisi</i>     | Jurassic, Bathonian | pdt18126                                                                                                       | ?  |
|                | <i>Proboscino</i> <i>p</i> <i>ora</i><br>cf. <i>divisi</i> | Jurassic, Bathonian | pdt18089                                                                                                       | ?  |
|                | <i>Proboscino</i> <i>p</i> <i>ora</i><br>sp. 1             | Jurassic, Bathonian | pdt17596<br>,<br>pdt17489<br>,<br>pdt17663                                                                     | ?8 |
|                | <i>Proboscino</i> <i>p</i> <i>ora</i><br>sp. 2             | Jurassic, Bajocian  | pdt18252                                                                                                       | ?  |
|                | <i>Stomatopora</i> cf.<br><i>bajocensis</i>                | Jurassic, Bathonian | pdt17328<br>,<br>pdt17330                                                                                      | 1  |
|                | <i>Stomatopora</i>                                         | Jurassic, Bathonian | pdt17636                                                                                                       | ?1 |

---

|                |                            |                     |          |     |
|----------------|----------------------------|---------------------|----------|-----|
|                | <i>cunningtoni</i>         |                     |          |     |
|                | <i>Stomatopora</i>         | Jurassic,           | pdt5138, | 7/  |
|                | ' <i>dichotomoides</i> '   | Aalenian/Bathonian  | pdt18250 | 8   |
|                |                            | n                   | ,        |     |
|                |                            |                     | pdt18087 |     |
|                |                            |                     | ,        |     |
|                |                            |                     | pdt5161, |     |
|                |                            |                     | SP7 975  |     |
|                | <i>Stomatopora</i> sp. 1   | Jurassic, Bathonian | pdt17609 | 1   |
|                |                            |                     | ,        |     |
|                |                            |                     | pdt18235 |     |
|                | <i>Stomatopora</i> sp. 2   | Jurassic, Bathonian | pdt18217 | 7   |
|                | <i>Stomatopora</i> sp. 3   | Jurassic,           |          |     |
|                | [Zalas, Poland]            | Bathonian/Callovia  | pdt13238 | 1   |
|                |                            | n                   |          |     |
| Incertae sedis | ' <i>Bereniced</i> ' sp. 1 | Jurassic, Bathonian |          |     |
|                |                            |                     | pdt17600 | ?   |
|                | ' <i>Bereniced</i> ' sp. 2 | Jurassic, Bathonian |          |     |
|                |                            |                     | pdt17604 | ?2, |
|                |                            |                     |          | ?5  |
|                | ' <i>Bereniced</i> ' sp. 3 | Jurassic, Bathonian | pdt18221 | 1   |
|                |                            |                     | ,        |     |
|                |                            |                     | pdt18223 |     |
|                |                            |                     | ,        |     |
|                |                            |                     | pdt18092 |     |
|                |                            |                     | ,        |     |
|                |                            |                     | pdt18094 |     |
|                | ' <i>Bereniced</i> ' sp. 4 | Cretaceous, Albian  | pdt17629 | ?   |
|                | <i>Prosthenoeia</i> sp.    | Pleistocene         | pdt8882  |     |
|                |                            |                     |          | 1   |

---
