# Supplementary material
Source: publisher figshare collection journal article supplement (https://tandf.figshare.com/articles/dataset/_/5531032)
Supplement: Supplementary file 2 [file 1]

**Supplemental Table 1.** List of Recent taxa studied with their traditional subordinal and familial attributions. Excludes ancestrulae of completely unknown identity. Protoecium pseudopore pattern types are: 1 = no pseudopores; 2 = sparse; 3 = peripheral row; 4 = peripheral row and distomedial pair; 5 = peripheral row plus sparse central; 6 = peripheral band; 7 = central only; 8 = pan-protoecial; n/a = interior walled and therefore lacking pseudopores; iw = interior-walled protoecium lacking pseudopores.

| Suborder     | Family         | Species                                          | SEM nos                                                                   | Pattern |
|--------------|----------------|--------------------------------------------------|---------------------------------------------------------------------------|---------|
| Articulata   | Crisiidae      | <i>Filicrisia geniculata</i>                     | pdt13490<br>pdt13496<br>pdt13509<br>pdt13513<br>pdt13522                  | 1       |
| Cancellata   | Horneridae     | <i>Hornera ?robusta</i>                          | pdt0397,<br>pdt17323,<br>pdt17325,<br>pdt17517                            | iw      |
| Ceriporina   | Heteroporidae  | <i>'Heteropora'</i><br><i>neozelanica</i>        | pdt16000,<br>pdt16010                                                     | 6       |
| Tubuliporina | Annectocymidae | <i>Annectocyma major</i>                         | pdt17302                                                                  | 7       |
|              |                | <i>Annectocyma</i> cf.<br><i>major</i> [Croatia] | 52127                                                                     | 7       |
|              |                | <i>Annectocyma</i> sp. [New Zealand]             | pdt0194                                                                   | 6?      |
|              |                | <i>Entalophoroecia deflexa</i>                   | pdt17252,<br>pdt15994,<br>pdt17246,<br>pdt17249,<br>pdt17451,<br>pdt17439 | 5       |
|              | Crisuliporidae | <i>Crisulipora occidentalis</i>                  | pdt15853                                                                  | 8       |

|                |                                                                                                                                                                                                                                                                                                        |                                                                                                                                                              |                                       |
|----------------|--------------------------------------------------------------------------------------------------------------------------------------------------------------------------------------------------------------------------------------------------------------------------------------------------------|--------------------------------------------------------------------------------------------------------------------------------------------------------------|---------------------------------------|
| Cytitidae      | ? <i>Telopora</i> spp.                                                                                                                                                                                                                                                                                 | pdt17211,<br>pdt17233,<br>pdt17235,<br>pdt17237,<br>pdt17239,<br>pdt10425,<br>pdt17515,                                                                      | 1                                     |
| Diaperoeciidae | <i>Diaperoecia</i><br><i>purpurascens</i><br>cf. <i>Diaperoecia</i> [Japan]                                                                                                                                                                                                                            | pdt15986<br>MW0239,<br>MW0259                                                                                                                                | 6<br>8(?)                             |
| Frondiporidae  | <i>Filifascigera</i> sp. [New Zealand]<br>? <i>Fasciculiporoides</i><br><i>americana</i>                                                                                                                                                                                                               | pdt17507<br>pdt17443                                                                                                                                         | 8<br>?                                |
| Hastingsiidae  | ' <i>Hastingsia</i> ' <i>whitteni</i><br><br>' <i>Hastingsia</i> '                                                                                                                                                                                                                                     | pdt17872,<br>pdt17878<br>pdt15864                                                                                                                            | 6<br>6                                |
| Oncousoeciidae | <i>Microeciella</i><br><i>suborbicularis</i><br><br><i>Microeciella</i> aff.<br><i>suborbicularis</i><br>[Mediterranean]<br>? <i>Microeciella</i><br><i>compacta</i><br><i>Oncousoecia</i><br><i>diastoporodes</i><br><i>Oncousoecia dilatans</i><br><br><i>Oncousoecia</i> sp. 1<br>[English Channel] | pdt8362,<br>pdt8367,<br>pdt17268,<br>pdt17271,<br>pdt17272,<br>pdt17278,<br>pdt17286,<br>pdt17289<br>pdt17200<br>pdt17427<br>pdt8311,<br>pdt8383<br>pdt17259 | 4<br><br>5<br><br>2?<br>6?<br>4<br>?3 |

---

|                |                              |           |      |
|----------------|------------------------------|-----------|------|
|                | <i>Oncousoecia</i> sp. 2     | pdt17159, | 3    |
|                | [Russia]                     | pdt17181  |      |
| Plagioeciidae  | <i>Diplosolen obelium</i>    | pdt17431  | 3    |
|                | <i>Liripora</i>              | 28813     | 3    |
|                | <i>pseudosarniensis</i>      |           |      |
|                | <i>Plagioecia patina</i>     | pdt17405, | 3    |
|                |                              | pdt17493, |      |
|                |                              | pdt17453  |      |
|                | <i>Plagioecia sarniensis</i> | pdt17190, | 5    |
|                | [Mediterranean]              | pdt17194, |      |
|                |                              | pdt17198, |      |
|                |                              | pdt17282, |      |
|                |                              | pdt17288, |      |
|                |                              | pdt17290, |      |
|                |                              | pdt17292  |      |
|                | <i>Plagioecia</i> cf.        | pdt17161  | 3?   |
|                | <i>sarniensis</i> [Russia]   |           |      |
|                | ? <i>Plagioecia</i> cf.      | pdt17179  | ?    |
|                | <i>sarniensis</i>            |           |      |
| Stomatoporidae | <i>Stomatoporina</i>         | pdt17255  | 3    |
|                | <i>incurvata</i>             |           |      |
| Tubuliporidae  | ? <i>Exidmonea triforis</i>  | pdt17455  | 1/2? |
|                | <i>Platonea</i> sp. 1 [NZOI  | pdt17205  | 1    |
|                | Station B235]                |           |      |
|                | <i>Platonea</i> sp. 2 [Otago | pdt17214, | 1    |
|                | Shelf, New Zealand]          | pdt17220  |      |
|                | <i>Platonea</i> sp. 3 [Otago | pdt17217  | 3    |
|                | Shelf, New Zealand]          |           |      |
|                | <i>Platonea</i> sp. 4 [Otago | pdt17223  | 1    |
|                | Shelf, New Zealand]          |           |      |
|                | <i>Tubulipora liliacea</i>   | MW0363    | 1(?) |
|                | <i>Tubulipora lobifera</i>   | pdt17263  | 1    |
|                | <i>Tubulipora</i>            | pdt17307, | 1    |
|                | <i>occidentalis</i>          | pdt17313, |      |

---

|                |                                                                                             |                                    |      |
|----------------|---------------------------------------------------------------------------------------------|------------------------------------|------|
|                |                                                                                             | pdt17318,<br>pdt17320,<br>pdt17322 |      |
|                | <i>Tubulipora plumosa</i>                                                                   | pdt13535,<br>pdt17296              | 1    |
|                | <i>Tubulipora ziczac</i>                                                                    | pdt17187,<br>pdt17189,<br>pdt17192 | 1    |
|                | <i>Tubulipora ?hemisepta</i>                                                                | MW0449                             | 1(?) |
|                | <i>Tubulipora</i> sp. [blue,<br>New Zealand]                                                | MW0170                             | 1    |
|                | ? <i>Tubulipora</i> sp.<br>[English Channel]                                                | pdt17273                           | 1    |
|                | <i>Tubulipora</i> sp. 1<br>[‘blue’, Japan]                                                  | MW0322                             | 1    |
|                | <i>Tubulipora</i> sp. 2<br>[Otago Shelf, New<br>Zealand]                                    | MW0003                             | 1    |
|                | <i>Tubulipora</i> sp. 3 [‘long<br>branches’]                                                | MW0406                             | 1    |
|                | <i>Tubulipora</i> sp. 4 [‘big<br>Tubulipora’]                                               | MW0414                             | 1    |
|                | <i>Tubulipora</i> sp. 5<br>[Marseille]                                                      | MW0497                             | ?    |
| Incertae sedis | ‘ <i>Stomatopora</i><br><i>subrotunda</i>                                                   | 8224, 43768                        | 2    |
|                | large tubuliporine<br>[New Zealand;<br>probably <i>Diaperoecia</i><br><i>purpurascens</i> ] | MW0181                             | 6    |
|                | big tubuliporine [New<br>Zealand; possibly <i>D.</i><br><i>purpurascens</i> ]               | 207                                | 6    |

---

|                   |                |                                                      |                                                                                                                                                         |      |
|-------------------|----------------|------------------------------------------------------|---------------------------------------------------------------------------------------------------------------------------------------------------------|------|
|                   |                | erect tubuliporine<br>[New Zealand]                  | MW0504                                                                                                                                                  | 1    |
|                   |                | tubuliporine with<br>pustulose protoecium<br>[Japan] | MW0242                                                                                                                                                  | 1(?) |
| Rectangulata      | Lichenoporidae | <i>Disporella hispida</i>                            | pdt17504,<br>1328, 1242,<br>pdt13544,<br>pdt13545,<br>pdt8385                                                                                           | 1    |
|                   |                | <i>Disporella</i> cf. <i>gordoni</i>                 | MW0641,<br>MW0647                                                                                                                                       | 1    |
|                   |                | <i>Disporella</i> cf.<br><i>mamillata</i>            | 29951, 39443                                                                                                                                            | 1    |
|                   |                | <i>Disporella</i> sp. [Otago<br>Shelf, New Zealand]  | MW0120                                                                                                                                                  | 1    |
|                   |                | lichenoporid sp. 2<br>[Japan]                        | pdt17141,<br>pdt17142,<br>pdt17144,<br>pdt17145,<br>pdt17148,<br>pdt17149,<br>pdt17150,<br>pdt17151,<br>pdt17152,<br>pdt17154,<br>pdt17155,<br>pdt17156 | 1    |
|                   |                | lichenoporid sp. 3<br>[Russia]                       | pdt17166                                                                                                                                                | 1    |
| Incertae<br>sedis | Cinctiporidae  | <i>Cinctipora elegans</i>                            | Anna Wood1,<br>Anna Wood2;<br>SP37 661                                                                                                                  | 8    |
|                   |                | <i>Attinopora zealandica</i>                         | NIWA 73130-3                                                                                                                                            | 8    |

---
